# Supplementary material for: AHP6 Inhibits Cytokinin Signaling to Regulate the Orientation of Pericycle Cell Division during Lateral Root Initiation
Source: PubMed Central journal article supplement (PMC3572949; doi:10.1371/journal.pone.0056370), 2013-02-14

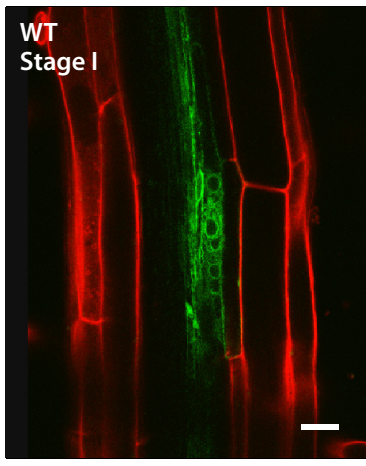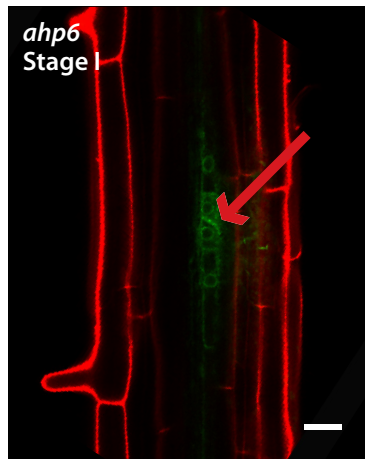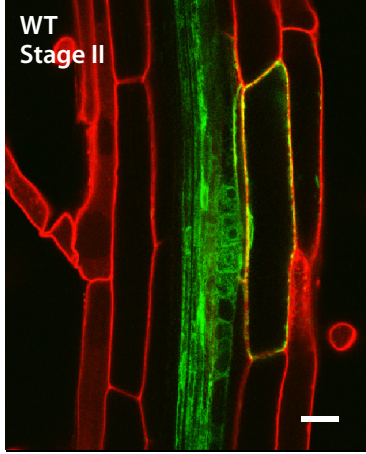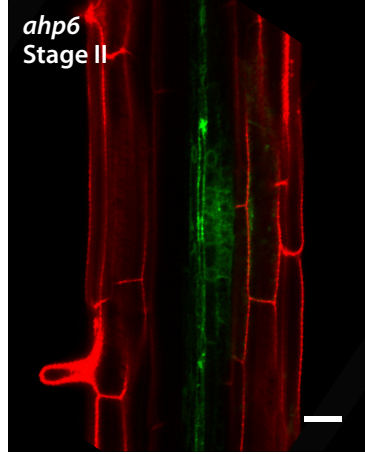

Supplement: pone.0056370.s002.pdf [file pone.0056370.s002.pdf]
