# Supplementary material for: AHP6 Inhibits Cytokinin Signaling to Regulate the Orientation of Pericycle Cell Division during Lateral Root Initiation
Source: PubMed Central journal article supplement (PMC3572949; doi:10.1371/journal.pone.0056370), 2013-02-14
Supplement: pone.0056370.s004.pdf [file pone.0056370.s004.pdf]

|                      | Without exogenous CK |                  |                      | With exogenous CK(10nM BAP) |                   |
|----------------------|----------------------|------------------|----------------------|-----------------------------|-------------------|
|                      | Stage I              | Stage II         |                      | Stage I                     | Stage II          |
| Col-0 (N=58)         | 0<br>(0/n=40)        | 0<br>(0/n=61)    | Col-0 (N=51)         | 0.26<br>(9/n=35)            | 0.27<br>(13/n=48) |
| <i>ahp6-1</i> (N=84) | 0.24<br>(9/n=37)     | 0.06<br>(4/n=72) | <i>ahp6-1</i> (N=58) | 0.41<br>(17/n=41)           | 0.50<br>(23/n=46) |
| <i>ahp6-3</i> (N=75) | 0.10<br>(5/n=48)     | 0.09<br>(5/n=55) | <i>ahp6-3</i> (N=56) | 0.30<br>(11/n=37)           | 0.28<br>(15/n=53) |

**Supporting Information**  
**Table S1**
